# Supplementary material for: Structural Evolution of Chemically-Driven RuO2 Nanowires and 3-Dimensional Design for Photo-Catalytic Applications
Source: PubMed Central journal article supplement (PMC4493639; doi:10.1038/srep11933), 2015-07-07

**Supplementary information**

# **Structural Evolution of Chemically-Driven RuO<sub>2</sub> Nanowires and 3-Dimensional Design for Photo-Catalytic Applications**

Joonmo Park<sup>1</sup>, Jae Won Lee<sup>1</sup>, Byeong Uk Ye<sup>1</sup>, Sung He Chun<sup>2</sup>, Sang Hoon Joo<sup>3</sup>, Hyunwoong Park<sup>4</sup>, Heon Lee<sup>5</sup>, Hu Young Jeong<sup>6</sup>, Myung Hwa Kim<sup>2\*</sup> & Jeong Min Baik<sup>1\*</sup>

<sup>1</sup>School of Materials Science and Engineering, KIST-UNIST-Ulsan Center for Convergent Materials, Ulsan National Institute of Science and Technology (UNIST), Ulsan 689-798, Republic of Korea.

<sup>2</sup>Department of Chemistry & Nano Science, Global Top 5 Program, Ewha Womans University, Seoul 120-745, Republic of Korea.

<sup>3</sup>School of Energy & Chemical Engineering Department of Chemistry Ulsan National Institute of Science & Technology (UNIST), Ulsan 689-798, Republic of Korea.

<sup>4</sup>School of Energy Engineering, Kyungpook National University, Daegu 702-701, Republic of Korea.

<sup>5</sup>Department of Materials Science and Engineering, Korea University, Anam-dong 5-ga, Seongbuk-gu, Seoul 136-713, Republic of Korea.

<sup>6</sup>UNIST Central Research Facilities (UCRF), Ulsan National Institute of Science and Technology (UNIST), Ulsan 689-798, Republic of Korea.

Corresponding author: jbaik@unist.ac.kr

**Figure S1.** The length and diameter of RuO<sub>2</sub> nanowires with the annealing temperature.

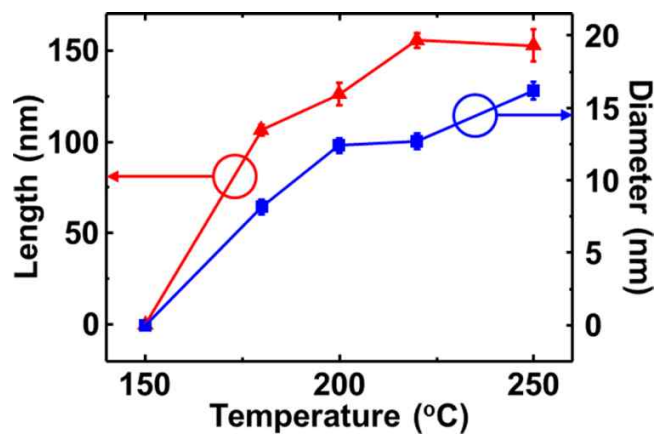

**Figure S2.** (a) Schematic diagram of electrochemical cell for voltammetry. (b) Schematic energy level diagram of plasmonic system with OEC for solar water splitting.

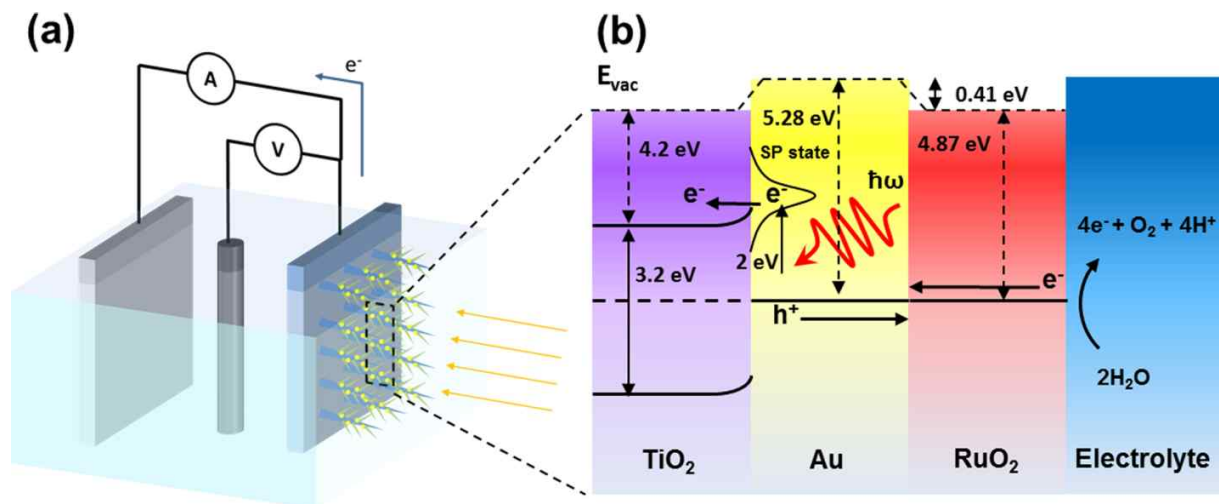

Supplement: srep11933-s1.pdf [file srep11933-s1.pdf]
